# Supplementary material for: Diverse Partitiviruses From the Phytopathogenic Fungus, Rosellinia necatrix
Source: PubMed Central journal article supplement (PMC7332551; doi:10.3389/fmicb.2020.01064), 2020-06-26
Supplement: Data_Sheet_1.pdf [file Data_Sheet_1.pdf]

## Supplementary information for

### Diverse partitiviruses from the phytopathogenic fungus, *Rosellinia necatrix*

Paul Telengech<sup>1</sup>, Sakae Hisano<sup>1</sup>, Cyrus Mugambi<sup>1</sup>, Kiwamu Hyodo<sup>1</sup>, Juan Manuel Arjona-López<sup>2</sup>, Carlos José López-Herrera<sup>2</sup>, Satoko Kanematsu<sup>3\*</sup>, Hideki Kondo<sup>1</sup>, and Nobuhiro Suzuki<sup>1\*</sup>

<sup>1</sup>Institute of Plant Science and Resources, Okayama University, Chuo 2-20-1, Kurashiki, 710-0046, Japan

<sup>2</sup>Institute for Sustainable Agriculture, Spanish Research Council. Alameda del Obispo s/n 14004. Córdoba, Spain

<sup>3</sup> Institute of Fruit Tree Science, National Agriculture and Food Research Organization (NARO), Morioka, Iwate 020-0123, Japan Institute of Fruit Tree Science (NIFTS), National Agriculture and Food Research Organization (NARO), Morioka, Iwate 020-0123, Japan

\* Present address: NIFTS, NARO, Tsukuba, Ibaraki, 305-8605, Japan.

Running title: Diverse partitiviruses of *Rosellinia necatrix*

+Correspondence may be sent to N. Suzuki

Agrivirology Laboratory, Institute of Plant Science and Resources, Okayama University  
Kurashiki, Okayama 710-0046, JAPAN

Telephone: 81-86-434-1230

FAX: 81-86-434-1232

E-mail: nsuzuki@okayama-u.ac.jp

**Supplementary FIGURE S1.** The presence of a potential translational enhancer (CAA repeats) at the 5' UTR of three *R. necatrix* partitiviruses, RnPV19, RnPV22 (alphapartitiviruses) and RnPV20 (a betapartitivirus).

**Supplementary FIGURE S2.** Conserved sequences at the 5' plus strand termini of novel *R. necatrix* alpha- and betapartitiviruses. Conserved residues are highlighted in grey and the consensus is shown (M: A or C; N: any nt; S: C or G; W: A or U; Y: C or U).

**Supplementary FIGURE S3.** Phylogenetic ML trees and a pairwise comparison of RdRPs (dsRNA1) and CPs (dsRNA2) encoded by *R. necatrix* alphapartitiviruses (A) and betapartitiviruses (B). Names of novel partitiviruses (RnPV11–25) are indicated using red text. Each number (selected) and/or colored box within the matrix represents pairwise amino acid identities (%) between partitiviruses that were calculated using SDT version 1.2.

**Supplementary FIGURE S4.** Colony morphology of *R. necatrix* W97 and *C. parasitica* wild-type EP155 and its mutant  $\Delta dcl2$  infected with partitiviruses. (A) Phenotypes of *R. necatrix* W97 uninfected (VF) and quintuply infected with RnPV1 + RnPV14 to RnPV17 (originally harbored in W744). (B) Phenotype of *C. parasitica* strains  $\Delta dcl2$  and EP155 infected with RnPV18/W442, RnPV19/W442 and RnPV3/W118. (C) Colony morphology of *R. necatrix* W97 infected with the different partitiviruses. Purified virion fractions from W98, W118, W442, W1134, and W774 were transfected into W97, mostly resulting in mixed infection by more than two partitiviruses. The virus-infected W97 colonies, in parallel with virus free W97 strain, were grown in PDA for one week on a benchtop and photographed. W97 infected by RnPV1 + RnPV14 to RnPV17 was a subculture from the original transfectant shown in (A).



## Supplementary Figure S2

### Alphapartitiviruses

|               |                        |
|---------------|------------------------|
| RnPV12-dsRNA1 | CGAAAACUUAACCAUAGCUUU  |
| RnPV12-dsRNA2 | CGAAAACUUAACCAUAGUCUU  |
| RnPV19-dsRNA1 | -GAAGACUCCGACAGCUCUCA  |
| RnPV19-dsRNA2 | AGAAGACUCCUUCUACCUGCU  |
| RnPV22-dsRNA1 | AGAACCUUAACGGACGAAUUG  |
| RnPV22-dsRNA2 | AGAACCUUAACGGACGAAUUG  |
| CONSENSUS     | GAANMYUNMNNNSWNNNNNNYN |

### Betapartitiviruses

|               |                        |
|---------------|------------------------|
| RnPV11-dsRNA1 | GAAUCCUCGAUUAUAGCGACU  |
| RnPV11-dsRNA2 | GAAUCCUCGAUUAUACCGACU  |
| RnPV14-dsRNA1 | GGUUUUCUCUAGGAAAGUCA   |
| RnPV14-dsRNA2 | GGUUUUCUCUAGGAAAGUCA   |
| RnPV15-dsRNA1 | AGUAUUUCUCUGCUCGCCCC   |
| RnPV15-dsRNA2 | AGUAUUUCUCUGCUCGCCCC   |
| RnPV16-dsRNA1 | UGAUUUUCUUGCAGGCCCCCC  |
| RnPV16-dsRNA2 | UGAUUUUCUUGCAGGCCCCCC  |
| RnPV17-dsRNA1 | GAAUAAGGUUCUAUACGCC    |
| RnPV17-dsRNA2 | GAAUAAGGUUCUAUACGCC    |
| RnPV18-dsRNA1 | GGUUUUCUCUAGCUCGCGCC   |
| RnPV18-dsRNA2 | GGUUUUCUCUAGCUCGCGCC   |
| RnPV20-dsRNA1 | GAAUACUGACUGCAAGCAA    |
| RnPV20-dsRNA2 | GAAUACUGCCUGCAAGCAA    |
| RnPV21-dsRNA1 | -GACUUUUCGUUAUAGCCCGCC |
| RnPV21-dsRNA2 | GGACUUUUCGUUAUAGCCCGCC |
| CONSENSUS     | GNNUNNNNNNNNNNNNSNMN   |

# Supplementary Figure S3

A

Alphapartitiviruses  
RdRp

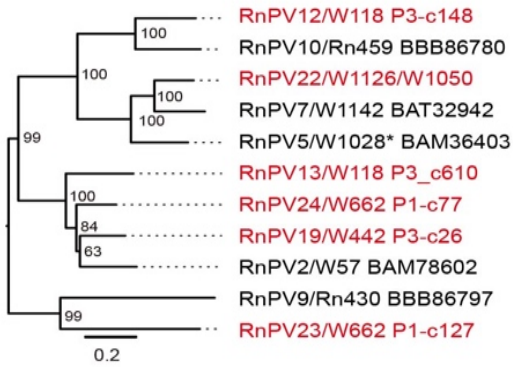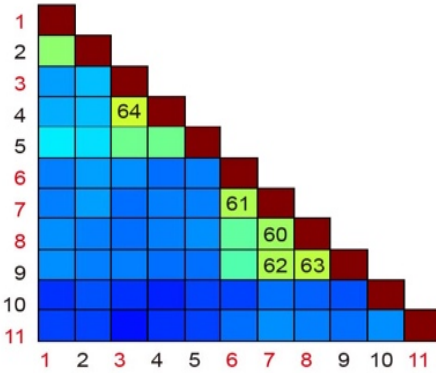

Pairwise identity(%)

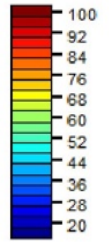

CP

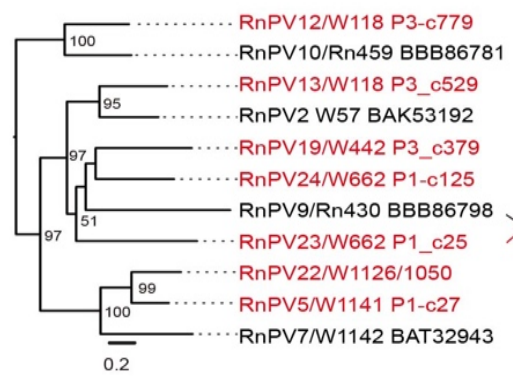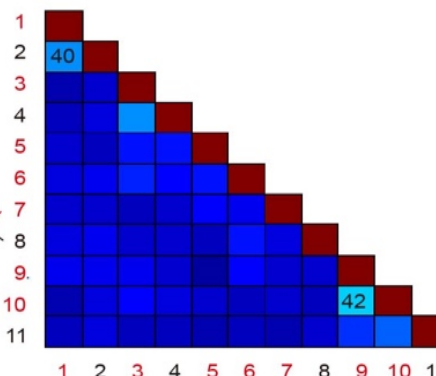

B

Betapartitiviruses  
RdRp

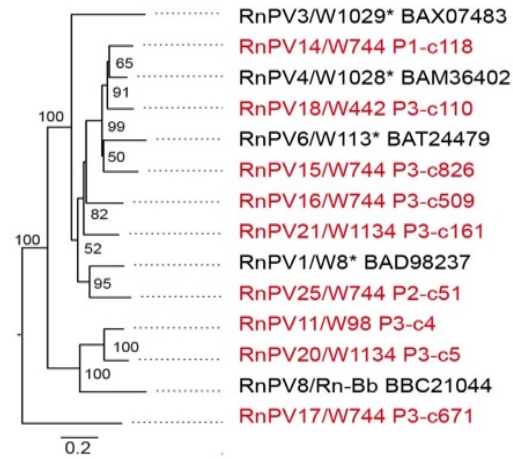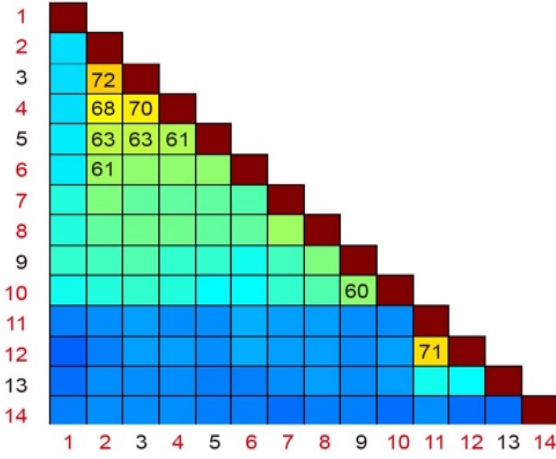

Pairwise identity(%)

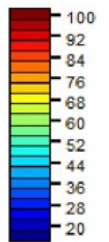

CP

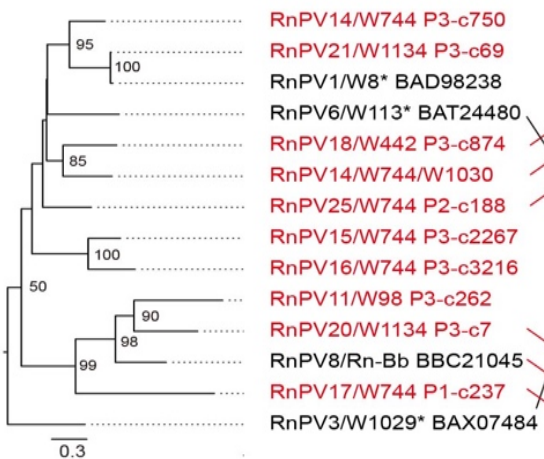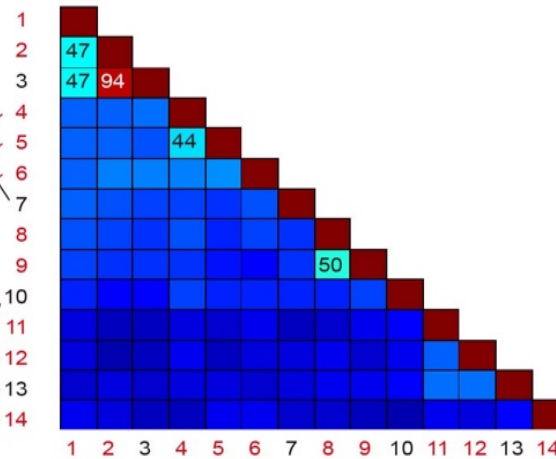

# Supplementary Figure S4

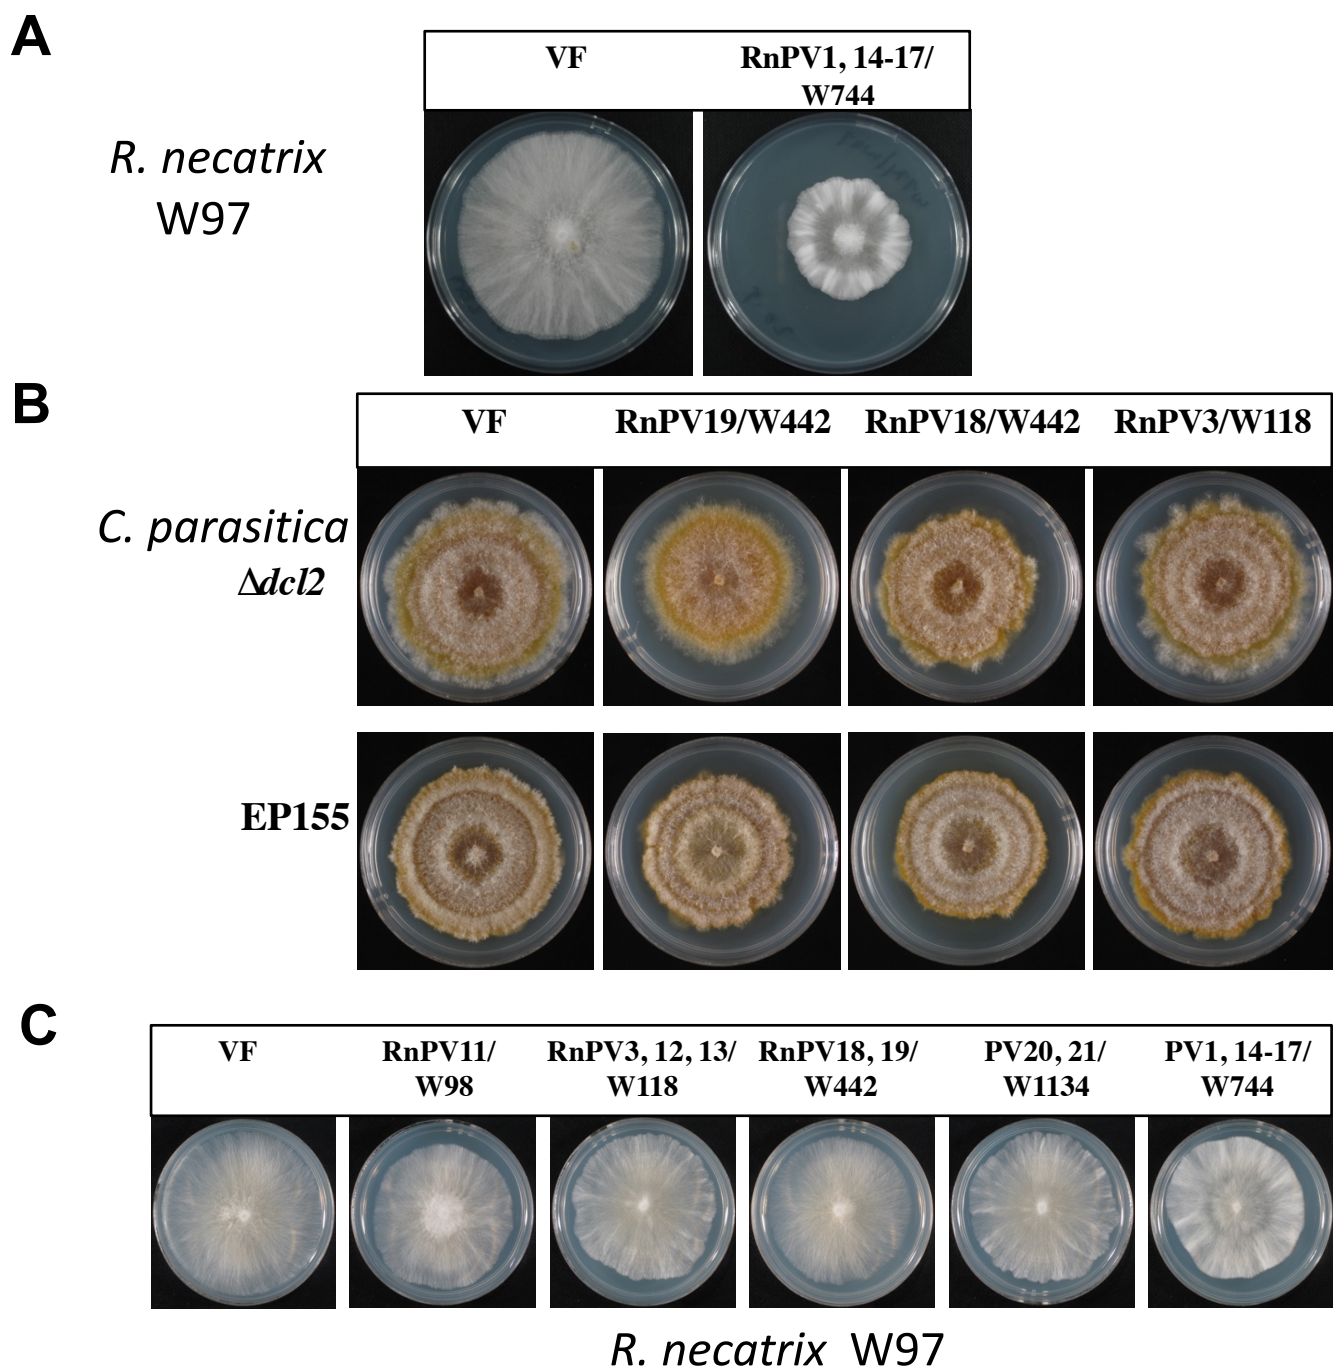

**Supplementary Table S1. List of primers**

| No | PRIMER NAME       | PRIMER SEQUENCE       | PURPOSE | No | PRIMER NAME       | PRIMER SEQUENCE          | PURPOSE |
|----|-------------------|-----------------------|---------|----|-------------------|--------------------------|---------|
| 1  | ngs 262R 98 cp    | ACGGAGATAGGCGTCACAGT  | RT-PCR  | 23 | ngs 509R rd w744  | AATGTAGCATCGGTTGTTCCG    | RT-PCR  |
| 2  | ngs 262F 98 cp    | ATGGACACTTCCGCATCTGG  | RT-PCR  | 24 | ngs 509F rd w744  | CTGCTGGTTCTGACCGAAC      | RT-PCR  |
| 3  | ngs 779R cp w118  | TGCAGGACGGGATGTAGTTC  | RT-PCR  | 25 | ngs 2267R cp w744 | GAATGAAGGTTACGTCGTTGTTG  | RT-PCR  |
| 4  | ngs 779F cp w118  | CGTGTCTATGACGATACAGAG | RT-PCR  | 26 | ngs 2267F cp w744 | TAATTGGAACAGAGCGTCCGTA   | RT-PCR  |
| 5  | ngs 148R Rd w118  | TATCGCCTTCTGAGCGTAAGT | RT-PCR  | 27 | ngs 118R Rd w744  | ATATCACCTGGGATATAGGATTCT | RT-PCR  |
| 6  | ngs 148F Rd w118  | TATACGATACTTGCGTCGAGC | RT-PCR  | 28 | ngs 118F Rd w744  | CCCGAACACGGTATCAACTATAA  | RT-PCR  |
| 7  | ngs 610R Rd w118  | GTAGCGTAGGGAGCACC AAT | RT-PCR  | 29 | ngs 750R cp w744  | AGACGACGTTTGACATAAGCG    | RT-PCR  |
| 8  | ngs 610F Rd w118  | GTCCTGCTTGCTCAACTACG  | RT-PCR  | 30 | ngs 750F cp w744  | TCGGAAGCGCATTGATGTC AA   | RT-PCR  |
| 9  | ngs 529R cp w118  | GGTAGTCAGGGCAGTTTCTC  | RT-PCR  | 31 | ngs 826R Rd w744  | GGTCGACAGTATTTGTCTAGGA   | RT-PCR  |
| 10 | ngs 529F cp w118  | CGATTGCTCTCCCTCTGGA A | RT-PCR  | 32 | ngs 826R Rd w744  | AAGTACCGCACAATGTCCGC     | RT-PCR  |
| 11 | ngs 379R cp w442  | GAGTTGGCGTCGTTCTCATC  | RT-PCR  | 33 | ngs 127 rd F      | AGATTATCGCTGACGCTCGC     | RT-PCR  |
| 12 | ngs 379F cp w442  | ACTGCTCAATCGATGGTCCTT | RT-PCR  | 34 | ngs 127 rd R      | CAGACCAGATAAGATGCCGC     | RT-PCR  |
| 13 | ngs 110R Rd w442  | GGATGTAGGATTCAGCAGCAT | RT-PCR  | 35 | ngs 77 rd F       | TGTTGGCGCTCCTTACGCTA     | RT-PCR  |
| 14 | ngs 110F Rd w442  | ACTCACTCTCGACATGAACG  | RT-PCR  | 36 | ngs 77 rd R       | TGTGTGTCTAGCGCGTCGAT     | RT-PCR  |
| 15 | ngs 5R Rd w1134   | GTTCTACAAAGGCAACGTGTG | RT-PCR  | 37 | ngs 51 rd F       | CTGGTCACTCTATGCATCCAATT  | RT-PCR  |
| 16 | ngs 5F Rd w1134   | CCTCAGCTGACGTACACGTT  | RT-PCR  | 38 | ngs 51 rd R       | TCAACAGCATATACAGGGCGTA   | RT-PCR  |
| 17 | ngs 7R cp w1134   | AGAAGGACGAGAAGACGTTGT | RT-PCR  | 39 | ngs 43 rd F       | TCGTAATCACATCTCAGATCGAG  | RT-PCR  |
| 18 | ngs 7F cp w1134   | ACTCGTTGGCACAAACTACGT | RT-PCR  | 40 | ngs 43 rd R       | GAGTTGTCGTCTCCCATTATGAA  | RT-PCR  |
| 19 | ngs 161R rd w1134 | TGTTGAGTCGTTTGTGGACGT | RT-PCR  | 41 | ngs 497 cp F      | ACACCGTTCTTCCACCGATC     | RT-PCR  |
| 20 | ngs 161F rd w1134 | TATGCTATCCCGAACGTGGC  | RT-PCR  | 42 | ngs 497 cp R      | TGATGCGGAGGTGTTGGAAAG    | RT-PCR  |
| 21 | ngs 3216R cp w744 | ACGATGGGAGTAGCCAGCA   | RT-PCR  | 43 | w118-5177 Rd F    | CACCTCTGACGAGTATGACG     | RT-PCR  |
| 22 | ngs 3216F cp w744 | CTCTTCGCTTCTATGGTTCTG | RT-PCR  | 44 | w118-5177 Rd R    | GTCGGATTTGACGACAGCAG     | RT-PCR  |

| No | PRIMER NAME | PRIMER SEQUENCE         | PURPOSE  | No | PRIMER NAME | PRIMER SEQUENCE         | PURPOSE           |
|----|-------------|-------------------------|----------|----|-------------|-------------------------|-------------------|
| 1  | 610F        | GGTGACGTAGTTGAGCAAGC    | RLM-RACE | 24 | 148R        | TTACCGTCGAAGCAAGACC     | RLM-RACE          |
| 2  | 610R        | CGATTAGTATTTGGCGCTCCTT  | RLM-RACE | 25 | 26F         | ATGATCGAGAGTGGGAAGCAA   | RLM-RACE          |
| 3  | 379F        | GGAGCCGGAGCCAATCCAA     | RLM-RACE | 26 | 26R         | TCCGACACTCGAATGACTAAG   | RLM-RACE          |
| 4  | 379R        | GCTCGATGAGAACGACGCC     | RLM-RACE | 27 | 874F        | GTTAGAGGTCTTGGTCATACC   | RLM-RACE          |
| 5  | 826F        | GCAGAGAGTACCATATTCCAG   | RLM-RACE | 28 | 874R        | GTTAACGCTGTCTACGCTACT   | RLM-RACE          |
| 6  | 826R        | GAAGCCGCCCGAATACTGAT    | RLM-RACE | 29 | 671F        | TGTACTTCGCGAGAGTGACCA   | RLM-RACE          |
| 7  | 2267F       | GAGCAGTTGGGTAGTAGACGA   | RLM-RACE | 30 | 671R        | GTGGTATGCAAGAACTCAATCGC | RLM-RACE          |
| 8  | 2267R       | TCCGCTCTCGGATATTCCTTC   | RLM-RACE | 31 | 4F          | TAGACCATGTAGCAGAGCTGA   | RLM-RACE          |
| 9  | 509F        | CAGACGCATAAGCGAGTCCAAAT | RLM-RACE | 32 | 4R          | CAGTCTACGCTGTCGCTCT     | RLM-RACE          |
| 10 | 509R        | CTTCAACGAATATCCCACGCTC  | RLM-RACE | 33 | 237F        | GTGTGAAGCATCGTAACGAGG   | RLM-RACE          |
| 11 | 262F        | TTGCGGATTGCGAACCACTGT   | RLM-RACE | 34 | 237R        | TCTCGTCCAGAACTGGCTTTC   | RLM-RACE          |
| 12 | 262R        | TGCCCTCTACACCGACAACA    | RLM-RACE | 35 | 110F        | GCGGCCAATATCATAGGGAC    | RLM-RACE          |
| 13 | 779F        | GATCCGAGGTTGCAGATTGGA   | RLM-RACE | 36 | 110R        | ACACAGTATGCTAAGCTCCCG   | RLM-RACE          |
| 14 | 779R        | GTCGCTATCTCCTCAATTGTCC  | RLM-RACE | 37 | 7F          | AGTTGAGAGCATGCGAGACGT   | RLM-RACE          |
| 15 | 3216F       | TCCGAGCTGTGGAACGATCAT   | RLM-RACE | 38 | 7R          | CGTCACCAATGTCACCTTCAAC  | RLM-RACE          |
| 16 | 3216R       | ATGAAGCTCGCCTCCGCAAG    | RLM-RACE | 39 | 5F          | GTGTACTTGATAACGCGAGTGA  | RLM-RACE          |
| 17 | 347F        | TGCGACGTTTCGCGAAGATT    | RLM-RACE | 40 | 5R          | AATCCGACCCGTTTACGCC     | RLM-RACE          |
| 18 | 347R        | CCACTCCTATGCTCATCAACTCA | RLM-RACE | 41 | 69R         | CGAACGCGTTGATTGGGTAG    | RLM-RACE          |
| 19 | 750F        | GCGGGTCGGTGACATTATCTT   | RLM-RACE | 42 | 69F         | TCTCTACCTCATTGACTTCGCT  | RLM-RACE          |
| 20 | 750R        | CTCAAGATCGTGCTCTCATCC   | RLM-RACE | 43 | W558-RdRp-F | TACGCCCTGTTTACGCCGT     | Probe preparation |
| 21 | 161F        | GGACCGGAGTACAGTAATGAC   | RLM-RACE | 44 | W558-RdRp-R | ATGTGATAACGAGTGAGAGCGT  | Probe preparation |
| 22 | 161R        | AGGAACTGGCTATCACAACCG   | RLM-RACE | 45 | W98-RdRp-F  | GCCCTCAACTTTCAATCCTTTG  | Probe preparation |
| 23 | 148F        | AGCTGCTGATAATGAGGTGAG   | RLM-RACE | 46 | W98-RdRp-R  | TACGCTTCTACGCGCCATG     | Probe preparation |



**Supplementary Table S2. Conserved 5' and 3' genome sequences of dsRNA1 and dsRNA2 of *R. necatrix* partitiviruses**

| VIRUS  | 5'-TERMINAL SEQUENCE                                                                                        | 3'-TERMINAL SEQUENCE                                             |
|--------|-------------------------------------------------------------------------------------------------------------|------------------------------------------------------------------|
| RnPV10 | dsRNA1 <b>AGATTTAAGTCCCTCCGGAA---</b><br>dsRNA2 <b>AGATTTAAGTCCCTCCGGAA---</b><br>*****                     | dsRNA1 ---TTTCCTAATGTTAAAGC<br>dsRNA2 ---TTTCCTTCATTTTAAAGC      |
| RnPV11 | dsRNA1 <b>GAAUCCUCGAUAUAGCGACUCCCUCG---</b><br>dsRNA2 <b>GAAUCCUCGAUAUACCGACUCCC-CG---</b><br>***** **      | Poly (A) with no additional nucleotides                          |
| RnPV12 | dsRNA1 <b>CGAAACUUAACCAUAGCUUUCGAUCUU---</b><br>dsRNA2 <b>CGAAACUUAACCAUAGUCUUCGAUCUU---</b><br>*****.***** | dsRNA1 ---CAAAAAAAAAAACC<br>dsRNA2 ---CAAAAAAAAAAACC             |
| RnPV13 | dsRNA1 - 5' terminal incomplete                                                                             | dsRNA1 ---AAAAAAAAAAUUU<br>dsRNA2 ---AAAAAAAAAAUUU               |
| RnPV14 | dsRNA1 <b>GGUUUCUCUAGGAAAGUCACU---</b><br>dsRNA2 <b>GGUUUCUCUAGGAAAGUCACU---</b><br>*****                   | Poly (A) with no additional nucleotides                          |
| RnPV15 | dsRNA1 <b>AGUAUUUCUCUGCUCGCCCCUCGCGCCA---</b><br>dsRNA2 <b>AGUAUUUCUCUGCUCGCCCCUCGCGCCA---</b><br>*****     | Poly (A) with no additional nucleotides                          |
| RnPV16 | dsRNA1 <b>UGAUUUUCUUGCAGGCCCCCGCUCCAA---</b><br>dsRNA2 <b>UGAUUUUCUUGCAGGCCCCCGCUCCAA---</b><br>*****       | dsRNA1 ---AAAUAUCU<br>dsRNA2 ---AAAUAUCUC                        |
| RnPV17 | dsRNA1 <b>GAAUAAGGUUCUAUACGCCCG---</b><br>dsRNA2 <b>GAAUAAGGUUCUAUACGCCCG---</b><br>*****                   | dsRNA1 ---AAAAAAAAAAUCC<br>dsRNA2 ---AAAAAAAAAAUCC               |
| RnPV18 | dsRNA1 <b>GGUUUCUCUAGCUCGCGCCUCA---</b><br>dsRNA2 <b>GGUUUCUCUAGCUCGCGCCUCA---</b><br>*****                 | dsRNA1 ---AAAAAAAAAAUCC<br>dsRNA2 ---AAAAAAAAAAUCC               |
| RnPV19 | dsRNA1 <b>-GAAGACUCCGACAGCUCUC---</b><br>dsRNA2 <b>AGAAGACUCCUUCUACCUGC---</b><br>***** *..*                | dsRNA1 ---AAAAAAAAAAAGU<br>dsRNA2 ---AAAAAAAAAAAGU               |
| RnPV20 | dsRNA1 <b>GAAUACUGACUGCAAGCA---</b><br>dsRNA2 <b>GAAUACUGCCUGCAAGCA---</b><br>*****                         | dsRNA1 ---CAAACCCAAAAAAAAAACC<br>dsRNA2 ---CAAACCCAAAAAAAAAUACCC |
| RnPV21 | dsRNA1 <b>-GACUUUCGUUAUAGCCCGCCC---</b><br>dsRNA2 <b>GGACUUUCGUUAUAGCCCGCCC---</b><br>*****                 | dsRNA1 ---AAAAAAAAAAGUC<br>dsRNA2 ---ATTACCAAAGGUC               |
| RnPV22 | dsRNA1 <b>AGAACCUUAACGGACGAAUUGCACGAGAGC---</b><br>dsRNA2 <b>AGAACCUUAACGGACGAAUUGCACGAGAGC---</b><br>***** | dsRNA1 ---AAAAUAAA<br>dsRNA2 ---AAAAUAAA                         |

**Supplementary Table S3. Partitiviruses introduced into *R. necatrix* W97, *C. parasitica* EP155, and *C. parasitica*  $\Delta dcl2$**

| VIRUS STRAIN<br>(ABBREVIATION) | HOST STRAIN | VIRUS TRANSFECTED |               |       |
|--------------------------------|-------------|-------------------|---------------|-------|
|                                |             | W97               | $\Delta dcl2$ | EP155 |
| RnPV11                         | W98         | ✓                 | ✓             | ✓     |
| RnPV12                         | W118        | ✓                 | -             | -     |
| RnPV13                         |             | ✓                 | -             | -     |
| RnPV3-W118                     |             | ✓                 | ✓             | ✓     |
| RnPV18                         | W442        | ✓                 | ✓             | ✓     |
| RnPV19                         |             | ✓                 | ✓             | ✓     |
| RnPV14                         | W744        | ✓                 | ✓             | ✓     |
| RnPV15                         |             | ✓                 | -             | -     |
| RnPV16                         |             | ✓                 | ✓             | -     |
| RnPV17                         |             | ✓                 | -             | -     |
| RnPV1-W744                     |             | ✓                 | -             | -     |
| RnPV20                         | W1134       | ✓                 | ✓             | ✓     |
| RnPV21                         |             | ✓                 | -             | -     |
| RnPV6-W558                     | W558        | ✓                 | ✓             | ✓     |

✓ : transfectant obtained

-: experimental introduction not attempted

**Supplementary Table S4. Plant fungal partitiviruses included in the phylogenetic tree**

|                                   | <b>Virus name</b>                     | <b>Accession No.</b> |
|-----------------------------------|---------------------------------------|----------------------|
| <b>Plant partitivirus group 1</b> |                                       |                      |
|                                   | Beet cryptic virus 1                  | ACA81389             |
|                                   | White clover cryptic virus 1          | AAU14888             |
|                                   | Carrot cryptic virus                  | ACL93278             |
|                                   | Vicia cryptic virus                   | AAX39023             |
|                                   | Dill cryptic virus 1                  | AGY36136             |
|                                   | Red clover cryptic virus 1            | AGY36138             |
| <b>Plant partitivirus group 2</b> |                                       |                      |
|                                   | Arabidopsis halleri partitivirus 1    | BAV56959             |
|                                   | Rose partitivirus                     | ANQ45203             |
|                                   | Pear alphapartitivirus                | BBA66577             |
|                                   | Vicia faba partitivirus 1 ds3         | ABJ99996             |
|                                   | Medicago sativa alphapartitivirus 1   | AXY93817             |
|                                   | Medicago sativa alphapartitivirus 2   | QBC36014             |
|                                   | Raphanus sativus partitivirus 1       | ALT00589             |
| <b>Plant partitivirus group 3</b> |                                       |                      |
|                                   | Cannabis cryptic virus                | AET80948             |
|                                   | Crimson clover cryptic virus 2        | AGJ83769             |
|                                   | Dill cryptic virus 2                  | AGJ83771             |
|                                   | Hop trefoil cryptic virus 2           | AGJ83767             |
|                                   | Primula malacoides virus              | ABW82141             |
|                                   | Red clover cryptic virus 2            | AGJ83765             |
|                                   | White clover cryptic virus 2          | AGJ83763             |
| <b>Collapsed group</b>            |                                       |                      |
|                                   | Heterobasidion partitivirus 3-ec1     | ACO37245             |
|                                   | Heterobasidion partitivirus 12-an1    | AHL25151             |
|                                   | Heterobasidion partitivirus 13-an1    | AHL25153             |
|                                   | Heterobasidion partitivirus 15-pa1    | AHL25162             |
|                                   | Helicobasidium mompa partitivirus V70 | BAC23065             |
